# Supplementary material for: The DUF348 domains of resuscitation promoting factor 2 play important roles in the enzymatic and biological activities in Rhodococcus erythropolis KB1
Source: PeerJ. 2024 Nov 19;12:e18561. doi: 10.7717/peerj.18561 (PMC11583912; doi:10.7717/peerj.18561)
Supplement: Supplemental Information 5 [file peerj-12-18561-s005.xls]

## Sheet: Sheet1
Protein	Rpf2			1△DUF348			2△DUF348			3△DUF348
Muralytic activity (U)	775.601	786.765	695.012	539.802	552.169	576.306	463.077	466.126	467.143	441.503	420.118	439.295
