# Supplementary material for: The DUF348 domains of resuscitation promoting factor 2 play important roles in the enzymatic and biological activities in Rhodococcus erythropolis KB1
Source: PeerJ. 2024 Nov 19;12:e18561. doi: 10.7717/peerj.18561 (PMC11583912; doi:10.7717/peerj.18561)
Supplement: Supplemental Information 6 [file peerj-12-18561-s006.xls]

## Sheet: Sheet1
Protein Temp	Rpf2		1△DUF348		2△DUF348		3△DUF348
	Mean	SD	Mean	SD	Mean	SD	Mean	SD
20℃	622.44	24.12	521.85	11.54	459.165	6.87	410.075	18.64
30℃	755.125	18.27	683.875	24.675	543.375	7.98	510.375	4.41
40℃	724.5	4.32	588.75	22.41	497.875	31.725	460.75	19.845
50℃	377	28.455	185.125	35.545	140.75	23.52	50.75	5.985
60℃	100.17	9.435	58.725	6.63	57.915	10.455	2.7	1.57
70℃	0	0	0	0	0	0	0	0
80℃	0	0	0	0	0	0	0	0
