# Supplementary material for: The DUF348 domains of resuscitation promoting factor 2 play important roles in the enzymatic and biological activities in Rhodococcus erythropolis KB1
Source: PeerJ. 2024 Nov 19;12:e18561. doi: 10.7717/peerj.18561 (PMC11583912; doi:10.7717/peerj.18561)
Supplement: Supplemental Information 7 [file peerj-12-18561-s007.xls]

## Sheet: Sheet1
Metal ions Protein	Without metal ions		Zn2+		Mn2+		Co2+		Ca2+		Mg2+
	Mean	SD	Mean	SD	Mean	SD	Mean	SD	Mean	SD	Mean	SD
Rpf2	100	6.65	106.82	1.1	102.32	2.81	98.35	7.19	103.27	1.73	112.26	0.4
1△DUF348	100	3.34	114.6	8.54	99.93	0.2	93.48	2.29	100.23	0.43	107.28	1.78
2△DUF348	100	0.45	105.32	2.87	106.88	2.94	97.48	2.94	104.92	1.58	112.55	0.5
3△DUF348	100	2.71	108.1	2.04	97.03	0.49	91.51	2.76	99.74	1.45	113.52	0.52
