# Supplementary material for: The DUF348 domains of resuscitation promoting factor 2 play important roles in the enzymatic and biological activities in Rhodococcus erythropolis KB1
Source: PeerJ. 2024 Nov 19;12:e18561. doi: 10.7717/peerj.18561 (PMC11583912; doi:10.7717/peerj.18561)
Supplement: Supplemental Information 8 [file peerj-12-18561-s008.xls]

## Sheet: Sheet1
Protein Time(h)	Without Rpf2			Inactive Rpf2			1△DUF348			2△DUF348			3△DUF348			Rpf2
0	0	0	0	0	0	0	0	0	0	0	0	0	0	0	0	0	0	0
6	4.093	4.045	4.083	4.057	4.117	4.045	4.148	4.122	4.128	4.134	4.137	4.134	4.131	4.127	4.121	4.188	4.223	4.21
12	6.288	6.291	6.31	6.302	6.283	6.288	7.633	7.495	7.584	7.511	7.541	7.5	7.267	7.495	7.297	7.758	7.82	7.869
24	9.254	9.143	9.189	9.241	9.303	9.284	10.574	10.531	10.466	10.197	10.309	10.39	10.002	10.051	9.924	10.742	10.816	10.658
36	10.325	10.574	10.027	10.273	10.059	10.439	11.133	11.022	11.035	10.767	10.74	10.653	10.412	10.685	10.197	11.558	11.572	11.434
48	10.629	10.764	10.767	10.837	10.778	10.753	11.678	11.488	11.87	11.341	11.154	11.2	10.864	11.032	10.924	12.374	12.393	12.241
60	12.152	11.594	11.824	11.575	12.117	12.171	13.263	13.494	13.45	12.963	13.73	13.296	12.963	13.201	12.691	13.778	13.716	13.868
72	11.637	11.954	11.656	11.599	12.025	11.575	13.277	13.505	13.169	13.383	13.38	13.581	13.177	13.385	13.215	14.044	13.746	14.06
84	11.331	11.577	11.702	11.68	12.16	11.623	13.125	13.372	12.919	13.188	12.906	12.979	12.96	12.911	12.935	13.863	13.743	14.014
