# Supplementary material for: The DUF348 domains of resuscitation promoting factor 2 play important roles in the enzymatic and biological activities in Rhodococcus erythropolis KB1
Source: PeerJ. 2024 Nov 19;12:e18561. doi: 10.7717/peerj.18561 (PMC11583912; doi:10.7717/peerj.18561)
Supplement: Supplemental Information 9 [file peerj-12-18561-s009.xls]

## Sheet: Sheet1
Protein Time(h)	Without Rpf2		Inactive Rpf2		Rpf2		1△DUF348		2△DUF348		3△DUF348
	Mean	SD	Mean	SD	Mean	SD	Mean	SD	Mean	SD	Mean	SD
0	0	0	0	0	0	0	0	0	0	0	0	0
12	0.006	0.003	0.002	0.002	0.051	0.008	0.032	0.004	0.03	0.004	0.024	0.006
24	0.01	0.002	0.001	0.003	0.082	0.006	0.059	0.005	0.045	0.011	0.034	0.005
36	0.01	0.003	0.002	0.002	0.121	0.007	0.083	0.01	0.069	0.014	0.051	0.011
48	0.007	0.003	0.006	0.001	0.209	0.045	0.157	0.009	0.116	0.012	0.112	0.009
60	0.009	0.002	0.008	0.002	1.003	0.051	0.792	0.07	0.592	0.08	0.543	0.044
72	0.002	0.002	0.009	0.003	1.248	0.105	1.092	0.068	0.911	0.024	0.835	0.016
84	0.01	0.003	0.012	0.002	1.201	0.06	0.983	0.086	0.853	0.055	0.802	0.068
